# Supplementary material
Source: Elsevier journal article supplement (https://www.sciencedirect.com/science/article/pii/S2173572718300948)

## MATERIAL SUPLEMENTARIO

**Tabla 1.** Listado de preguntas por orden de importancia para los familiares, relacionado con el orden de importancia conferido a esas mismas cuestiones por enfermeras/os y médicos. En la primera columna figura la puntuación media otorgada a cada cuestión por los familiares. En la segunda y tercera columna el número de la pregunta en el cuestionario inicial y la pregunta como tal. En las columnas 4ª, 5ª y 6ª se presenta en número de orden por puntuación otorgada por cada grupo participante (en gris las 10 preguntas más importantes según los familiares y en color salmón las siguientes 10 preguntas por orden de importancia, también según las familias). En la última columna se dispone la categoría temática en la que se clasifica cada pregunta.

| Puntuac familiar | Nº pregunta | Preguntas                                                            | orden fam | orden enferm | orden med | Categorías temáticas                         |
|------------------|-------------|----------------------------------------------------------------------|-----------|--------------|-----------|----------------------------------------------|
| 8,721            | 12          | ¿Sobrevivirá?                                                        | 1         | 1            | 3         | Evolución/Secuelas                           |
| 8,588            | 7           | ¿Es grave lo que está pasando?                                       | 2         | 3            | 1         | Evolución/Secuelas                           |
| 8,525            | 11          | ¿Qué probabilidades tiene de recuperarse?                            | 3         | 5            | 5         | Evolución/Secuelas                           |
| 8,427            | 37          | ¿Puedo estar seguro de que me informarán si pasa algo?               | 4         | 9            | 16        | Gestión de la información                    |
| 8,424            | 54          | ¿Qué pruebas se han realizado y cuáles han sido los resultados?      | 5         | 11           | 10        | Plan terapéutico                             |
| 8,36             | 3           | ¿Cómo está?                                                          | 6         | 2            | 2         | Bienestar del paciente                       |
| 8,332            | 8           | ¿Cómo será la evolución previsiblemente?                             | 7         | 8            | 6         | Evolución/secuelas                           |
| 8,307            | 36          | ¿Cómo me mantendrán informado de lo que ocurra?                      | 8         | 12           | 15        | Gestión de la información                    |
| 8,298            | 10          | ¿Le quedarán secuelas?                                               | 9         | 7            | 7         | Evolución/Secuelas                           |
| 8,284            | 9           | ¿Volverá a hacer vida normal?                                        | 10        | 10           | 9         | Evolución/Secuelas                           |
| 8,268            | 6           | ¿Está sufriendo?                                                     | 11        | 4            | 4         | Bienestar del paciente                       |
| 8,244            | 15          | ¿Cuándo podrá respirar por sí mismo?                                 | 12        | 16           | 19        | Evolución/Secuelas                           |
| 8,196            | 17          | ¿Tiene dolor?                                                        | 13        | 6            | 8         | Bienestar del paciente                       |
| 8,151            | 80          | Si no hubiera más opciones de tratamiento, ¿Qué medidas se tomarían? | 14        | 22           | 13        | Plan terapéutico                             |
| 8,122            | 56          | ¿Cuáles son los planes a seguir?                                     | 15        | 26           | 17        | Plan terapéutico                             |
| 8,086            | 76          | ¿Qué tengo que saber para cuidarle bien cuando esté en casa?         | 16        | 57           | 58        | Participación familiar                       |
| 8,061            | 48          | ¿Se está haciendo todo lo posible?                                   | 17        | 13           | 12        | Plan terapéutico                             |
| 8,036            | 53          | ¿Qué tratamientos y qué otros cuidados está recibiendo?              | 18        | 40           | 42        | Plan terapéutico                             |
| 8,014            | 4           | ¿Cómo se siente mi familiar?                                         | 19        | 23           | 20        | Bienestar del paciente                       |
| 7,972            | 39          | ¿Es consciente de lo que está pasando?                               | 20        | 21           | 23        | Bienestar del paciente                       |
| 7,898            | 44          | ¿Aquí está vigilado continuamente?                                   | 21        | 35           | 45        | Entorno: profesionales, normas, equipamiento |
| 7,871            | 73          | ¿Cuánto tiempo va a estar ingresado en la UCI?                       | 22        | 14           | 14        | Plan terapéutico                             |
| 7,862            | 40          | ¿Siente que estamos con él?                                          | 23        | 25           | 43        | Bienestar del paciente                       |
| 7,847            | 14          | ¿Volverá a hablar?                                                   | 24        | 27           | 39        | Evolución/Secuelas                           |
| 7,815            | 69          | Si me dicen que está aislado, ¿Qué medidas debemos tomar?            | 25        | 36           | 31        | Participación familiar                       |
| 7,784            | 50          | ¿Recibe un buen trato por todo el personal de la uci?                | 26        | 65           | 66        | Bienestar del paciente                       |
| 7,769            | 51          | ¿Respetarán las últimas voluntades?                                  | 27        | 41           | 28        | Bienestar del paciente                       |

|       |    |                                                                                   |    |    |    |                                              |
|-------|----|-----------------------------------------------------------------------------------|----|----|----|----------------------------------------------|
| 7,753 | 5  | ¿Está cómodo?                                                                     | 28 | 28 | 33 | Bienestar del paciente                       |
| 7,731 | 27 | ¿Es bueno estimular al paciente o es más conveniente dejarle tranquilo?           | 29 | 34 | 35 | Participación familiar                       |
| 7,699 | 42 | ¿Está en coma o sedado? ¿Qué diferencias hay?                                     | 30 | 45 | 30 | Proceso patológico                           |
| 7,681 | 70 | Si tiene una infección, ¿Puede ser contagioso?                                    | 31 | 37 | 22 | Proceso patológico                           |
| 7,641 | 1  | ¿Cómo ha pasado esto?                                                             | 32 | 18 | 18 | Proceso patológico                           |
| 7,586 | 45 | ¿Quiénes son los profesionales que atienden a mi familiar?                        | 33 | 67 | 64 | Entorno: profesionales, normas, equipamiento |
| 7,57  | 78 | ¿Por qué puede necesitar una traqueostomía? ¿Sería para siempre?                  | 34 | 17 | 11 | Proceso patológico                           |
| 7,569 | 81 | ¿Qué debemos hacer en caso de fallecimiento?                                      | 35 | 33 | 27 | Qué hacer en caso de...                      |
| 7,556 | 75 | Después de la UCI, ¿Cuánto tiempo debe permanecer en el hospital hasta ir a casa? | 36 | 50 | 50 | Plan terapéutico                             |
| 7,514 | 74 | ¿Seguirá recibiendo los mismos cuidados cuando abandone la UCI?                   | 37 | 47 | 34 | Plan terapéutico                             |
| 7,513 | 52 | ¿Podemos pedir una segunda opinión?                                               | 38 | 58 | 38 | Gestión de la información                    |
| 7,5   | 59 | ¿Para qué sirven los tubos y máquinas a las que está conectado?                   | 39 | 15 | 44 | Entorno: profesionales, normas, equipamiento |
| 7,491 | 67 | ¿Hay decisiones que debo tomar yo? ¿Cuáles?                                       | 40 | 56 | 46 | Participación familiar                       |
| 7,489 | 49 | ¿Habría otras alternativas en otro lugar?                                         | 41 | 49 | 24 | Plan terapéutico                             |
| 7,479 | 57 | ¿Qué significan los datos que aparecen en el monitor?                             | 42 | 31 | 61 | Entorno: profesionales, normas, equipamiento |
| 7,478 | 21 | ¿Por qué su aspecto es distinto, hinchazón, color...?                             | 43 | 32 | 36 | Proceso patológico                           |
| 7,475 | 43 | ¿Por qué su comportamiento es distinto? ¿Se le pasará?                            | 44 | 20 | 26 | Proceso patológico                           |
| 7,47  | 18 | ¿Tiene fiebre?                                                                    | 45 | 30 | 48 | Proceso patológico                           |
| 7,394 | 13 | ¿Por qué no puede hablar?                                                         | 46 | 39 | 47 | Proceso patológico                           |
| 7,384 | 35 | ¿Qué medidas debo tomar para entrar a ver a mi familiar?                          | 47 | 66 | 54 | Participación familiar                       |
| 7,377 | 82 | En caso de fallecimiento, ¿Podría donar órganos? ¿Cómo?                           | 48 | 43 | 25 | Qué hacer en caso de...                      |
| 7,366 | 55 | ¿Debe seguir tomando la medicación que tomaba en casa?                            | 49 | 29 | 41 | Plan terapéutico                             |
| 7,355 | 60 | Los dispositivos que tienen puestos, ¿pueden acarrear complicaciones?             | 50 | 59 | 53 | Proceso patológico                           |
| 7,345 | 2  | ¿Se podría haber evitado esta situación?                                          | 51 | 46 | 29 | Proceso patológico                           |
| 7,344 | 58 | ¿Qué significan las alarmas que suenan?                                           | 52 | 19 | 59 | Entorno: profesionales, normas, equipamiento |
| 7,332 | 32 | ¿Es bueno que reciba visitas?                                                     | 53 | 51 | 49 | Participación familiar                       |
| 7,32  | 28 | ¿Puedo tocarlo?                                                                   | 54 | 24 | 40 | Participación familiar                       |
| 7,313 | 66 | ¿Qué puedo hacer por él/ella? (ayudar con los cuidados, dar de comer, higiene)    | 55 | 68 | 62 | Participación familiar                       |
| 7,302 | 16 | ¿Tiene heridas?                                                                   | 56 | 63 | 67 | Proceso patológico                           |
| 7,268 | 68 | ¿Qué trámites debo realizar?                                                      | 57 | 61 | 55 | Qué hacer en caso de...                      |
| 7,242 | 38 | ¿Puedo llamar por teléfono para preguntar cómo está?                              | 58 | 38 | 52 | Gestión de la información                    |
| 7,183 | 41 | ¿Podrá recordar algo de lo que ha sucedido?                                       | 59 | 60 | 56 | Evolución/Secuelas                           |
| 7,158 | 46 | ¿Qué especialidad tienen los profesionales que atienden a mi familiar?            | 60 | 81 | 77 | Entorno: profesionales, normas, equipamiento |
| 7,156 | 33 | ¿Cómo se organizan las visitas en esta unidad?                                    | 61 | 42 | 32 | Entorno: profesionales, normas, equipamiento |
| 7,144 | 23 | ¿Cómo se le alimenta?                                                             | 62 | 52 | 65 | Plan terapéutico                             |
| 7,064 | 22 | ¿Puede comer o beber?                                                             | 63 | 53 | 63 | Plan terapéutico                             |
| 7,053 | 79 | Si no es diabético ¿por qué le ponen insulina?                                    | 64 | 55 | 60 | Proceso patológico                           |
| 6,986 | 26 | ¿Orina con normalidad?                                                            | 65 | 73 | 71 | Proceso patológico                           |
| 6,964 | 47 | ¿Cómo se hace para llamar al personal?                                            | 66 | 74 | 74 | Entorno: profesionales,                      |

|       |    |                                                                                              |    |    |    |                                                     |
|-------|----|----------------------------------------------------------------------------------------------|----|----|----|-----------------------------------------------------|
|       |    |                                                                                              |    |    |    | <b>normas, equipamiento</b>                         |
| 6,947 | 31 | ¿Podemos acompañarlo siempre?                                                                | 67 | 44 | 37 | <b>Participación familiar</b>                       |
| 6,827 | 20 | ¿Tiene hambre o sed?                                                                         | 68 | 69 | 73 | <b>Bienestar del paciente</b>                       |
| 6,806 | 19 | ¿Tiene frío?                                                                                 | 69 | 64 | 72 | <b>Bienestar del paciente</b>                       |
| 6,797 | 72 | ¿Podemos disponer de ayuda psicológica?                                                      | 70 | 71 | 57 | <b>Participación familiar</b>                       |
| 6,659 | 71 | ¿Debo avisar a otros familiares?                                                             | 71 | 54 | 21 | <b>Qué hacer en caso de...</b>                      |
| 6,377 | 25 | ¿Realiza deposiciones con normalidad?                                                        | 72 | 78 | 78 | <b>Proceso patológico</b>                           |
| 6,124 | 63 | ¿Por qué tiene sujetas las manos?                                                            | 73 | 48 | 51 | <b>Proceso patológico</b>                           |
| 6,011 | 64 | ¿Por qué le tapan los ojos o le aplican cremas?                                              | 74 | 62 | 70 | <b>Proceso patológico</b>                           |
| 5,554 | 65 | ¿Por qué hay tanto ruido en la UCI?                                                          | 75 | 75 | 75 | <b>Entorno: profesionales, normas, equipamiento</b> |
| 5,498 | 29 | ¿Puede escuchar música?                                                                      | 76 | 77 | 76 | <b>Entorno: profesionales, normas, equipamiento</b> |
| 5,291 | 34 | ¿Pueden entrar familiares menores de edad?                                                   | 77 | 72 | 68 | <b>Entorno: profesionales, normas, equipamiento</b> |
| 5,259 | 61 | ¿Habría posibilidad de compaginar medicinas alternativas, como homeopatía, acupuntura, etc.? | 78 | 82 | 82 | <b>Plan terapéutico</b>                             |
| 5,167 | 62 | ¿Por qué está desnudo?                                                                       | 79 | 76 | 81 | <b>Entorno: profesionales, normas, equipamiento</b> |
| 5,036 | 24 | ¿Puedo traer comida de casa para el paciente?                                                | 80 | 80 | 80 | <b>Entorno: profesionales, normas, equipamiento</b> |
| 4,755 | 30 | ¿Puede usar su teléfono móvil?                                                               | 81 | 79 | 79 | <b>Entorno: profesionales, normas, equipamiento</b> |
| 4,717 | 77 | ¿Puede venir el sacerdote a verle?                                                           | 82 | 70 | 69 | <b>Entorno: profesionales, normas, equipamiento</b> |

**Tabla 2.** Profesional que puede responder cada pregunta desde la perspectiva del familiar.

| Pregunta                                                                       | Ambos<br>% | Enfermera/o<br>% | Médico<br>% |
|--------------------------------------------------------------------------------|------------|------------------|-------------|
| ¿Recibe un buen trato por todo el personal de la UCI?                          | 85,61      | 10,43            | 3,95        |
| ¿Quiénes son los profesionales que atienden a mi familiar?                     | 79,13      | 11,15            | 9,71        |
| ¿Qué especialidad tienen los profesionales que atienden a mi familiar?         | 77,09      | 9,45             | 13,45       |
| ¿Puedo estar seguro de que me informarán si pasa algo?                         | 73,18      | 9,78             | 17,02       |
| ¿Cómo se siente mi familiar?                                                   | 73,11      | 16,12            | 10,75       |
| ¿Está sufriendo?                                                               | 70,81      | 10,67            | 18,5        |
| ¿Cómo me mantendrán informado de lo que ocurra?                                | 70,75      | 11,91            | 17,32       |
| ¿Siente que estamos con él?                                                    | 69,2       | 18,47            | 12,31       |
| ¿Aquí está vigilado continuamente?                                             | 69,2       | 23,55            | 7,24        |
| ¿Es bueno que reciba visitas?                                                  | 68,95      | 21,66            | 9,38        |
| ¿Es consciente de lo que está pasando?                                         | 68         | 8                | 24          |
| ¿Tiene dolor?                                                                  | 67,39      | 21,37            | 11,23       |
| ¿Se está haciendo todo lo posible?                                             | 65,45      | 3,63             | 30,9        |
| ¿Es bueno estimular al paciente o es más conveniente dejarle tranquilo?        | 65,32      | 22,62            | 12,04       |
| ¿Cómo está?                                                                    | 65,24      | 3,19             | 31,56       |
| ¿Por qué su aspecto es distinto, hinchazón, color...?                          | 63,97      | 17,27            | 18,75       |
| ¿Podemos acompañarlo siempre?                                                  | 63,08      | 30,1             | 6,81        |
| ¿Tiene heridas?                                                                | 62,9       | 25,09            | 12          |
| ¿Qué significan los datos que aparecen en el monitor?                          | 61,53      | 32,6             | 5,86        |
| ¿Podrá recordar algo de lo que ha sucedido?                                    | 61,31      | 10,58            | 28,1        |
| ¿Respetarán las últimas voluntades?                                            | 60,9       | 2,63             | 36,46       |
| ¿Puedo llamar por teléfono para preguntar cómo está?                           | 60,66      | 31,61            | 7,72        |
| ¿Para qué sirven los tubos y máquinas a las que está conectado?                | 60,42      | 31,8             | 7,77        |
| ¿Puede venir el sacerdote a verle?                                             | 59,21      | 34,11            | 6,66        |
| ¿Qué trámites debo realizar?                                                   | 58,69      | 11,95            | 29,34       |
| Si me dicen que está aislado, ¿Qué medidas debemos tomar?                      | 58,6       | 21,97            | 19,41       |
| ¿Puede comer o beber?                                                          | 58,54      | 29,45            | 12          |
| ¿Podemos disponer de ayuda psicológica?                                        | 58,51      | 11,85            | 29,62       |
| Los dispositivos que tienen puestos, ¿pueden acarrear complicaciones?          | 58,42      | 15,05            | 26,52       |
| ¿Qué debemos hacer en caso de fallecimiento?                                   | 57,79      | 8,36             | 33,84       |
| ¿Por qué no puede hablar?                                                      | 57,47      | 6,89             | 35,63       |
| ¿Qué tratamientos y qué otros cuidados está recibiendo?                        | 57,24      | 3,26             | 39,49       |
| ¿Puedo tocarlo?                                                                | 56,52      | 39,85            | 3,62        |
| ¿Qué puedo hacer por él/ella? (ayudar con los cuidados, dar de comer, higiene) | 56,47      | 38,84            | 4,67        |
| ¿Tiene fiebre?                                                                 | 56,27      | 40,14            | 3,58        |
| ¿Por qué su comportamiento es distinto? ¿Se le pasará?                         | 54,61      | 5,16             | 40,22       |

|                                                                                   |       |       |       |
|-----------------------------------------------------------------------------------|-------|-------|-------|
| Si tiene una infección, ¿Puede ser contagioso?                                    | 54,37 | 9,12  | 36,49 |
| ¿Qué medidas debo tomar para entrar a ver a mi familiar?                          | 53,45 | 43,27 | 3,27  |
| ¿Cómo se hace para llamar al personal?                                            | 53,33 | 45,55 | 1,11  |
| ¿Cómo se le alimenta?                                                             | 53,28 | 35,76 | 10,94 |
| ¿Cómo se organizan las visitas en esta unidad?                                    | 52,91 | 43,79 | 3,28  |
| ¿Está cómodo?                                                                     | 52,83 | 43,61 | 3,54  |
| ¿Por qué tiene sujetas las manos?                                                 | 52,76 | 43,91 | 3,32  |
| ¿Debo avisar a otros familiares?                                                  | 52,74 | 16,84 | 30,4  |
| ¿Qué tengo que saber para cuidarle bien cuando esté en casa?                      | 52,51 | 12,58 | 34,89 |
| ¿Está en coma o sedado? ¿Qué diferencias hay?                                     | 52,22 | 5,55  | 42,22 |
| ¿Hay decisiones que debo tomar yo? ¿Cuáles?                                       | 52    | 5,09  | 42,9  |
| ¿Por qué hay tanto ruido en la UCI?                                               | 51,82 | 45,98 | 2,18  |
| ¿Pueden entrar familiares menores de edad?                                        | 50,9  | 43,68 | 5,41  |
| ¿Seguirá recibiendo los mismos cuidados cuando abandone la UCI?                   | 50,18 | 5,09  | 44,72 |
| ¿Orina con normalidad?                                                            | 47,33 | 46,26 | 6,4   |
| ¿Puedo traer comida de casa para el paciente?                                     | 46,44 | 45,31 | 8,23  |
| ¿Tiene frío?                                                                      | 41,57 | 57,34 | 1,07  |
| ¿Tiene hambre o sed?                                                              | 41,15 | 55,23 | 3,61  |
| ¿Por qué esta desnudo?                                                            | 46,2  | 51,26 | 2,52  |
| ¿Realiza deposiciones con normalidad?                                             | 42,14 | 50,71 | 7,14  |
| ¿Por qué le tapan los ojos o le aplican cremas?                                   | 46,9  | 50,54 | 2,54  |
| ¿Puede usar su teléfono móvil?                                                    | 47,6  | 49,44 | 2,95  |
| ¿Puede escuchar música?                                                           | 47,98 | 49,08 | 2,93  |
| ¿Qué significan las alarmas que suenan?                                           | 47,68 | 48,04 | 4,27  |
| ¿Sobrevivirá?                                                                     | 23,13 | 0     | 76,86 |
| ¿Le quedarán secuelas?                                                            | 24,11 | 0     | 75,88 |
| ¿Qué probabilidades tiene de recuperarse?                                         | 24,8  | 0     | 75,17 |
| ¿Volverá a hacer vida normal?                                                     | 27,11 | 0,35  | 72,53 |
| Si no hubiera más opciones de tratamiento, ¿Qué medidas se tomarían?              | 27,23 | 0,74  | 72,01 |
| ¿Cómo será la evolución previsiblemente?                                          | 30,28 | 0,35  | 69,36 |
| ¿Por qué puede necesitar una traqueostomía? ¿Sería para siempre?                  | 30,56 | 2,26  | 67,16 |
| ¿Se podría haber evitado esta situación?                                          | 32,25 | 0,71  | 67,02 |
| ¿Cuánto tiempo va a estar ingresado en la UCI?                                    | 32,74 | 0,35  | 66,9  |
| ¿Debe seguir tomando la medicación que tomaba en casa?                            | 29,36 | 4,08  | 66,54 |
| Después de la UCI, ¿Cuánto tiempo debe permanecer en el hospital hasta ir a casa? | 32,37 | 1,79  | 65,82 |
| ¿Podemos pedir una segunda opinión?                                               | 33,94 | 1,47  | 64,57 |
| ¿Cómo ha pasado esto?                                                             | 36,07 | 0,35  | 63,57 |
| ¿Qué pruebas se han realizado y cuáles han sido los resultados?                   | 35,25 | 1,43  | 63,3  |
| ¿Cuáles son los planes a seguir?                                                  | 35,86 | 1,08  | 63,04 |
| ¿Es grave lo que está pasando?                                                    | 38,35 | 1,07  | 60,57 |

|                                                                                              |   |       |       |       |
|----------------------------------------------------------------------------------------------|---|-------|-------|-------|
| ¿Habría otras alternativas en otro lugar?                                                    |   | 40,44 | 2,57  | 56,98 |
| ¿Cuándo podrá respirar por sí mismo?                                                         |   | 45,92 | 1,48  | 52,59 |
| ¿Habría posibilidad de compaginar medicinas alternativas, como homeopatía, acupuntura, etc.? |   | 40,67 | 8,2   | 51,11 |
| En caso de fallecimiento, ¿Podría donar órganos? ¿Cómo?                                      |   | 46    | 3,8   | 50,19 |
| ¿Volverá a hablar?                                                                           |   | 45,2  | 5,36  | 49,42 |
| Si no es diabético ¿por qué le ponen insulina?                                               |   | 43,72 | 9,5   | 46,76 |
|                                                                                              |   |       |       |       |
|                                                                                              | % | 51,92 | 19,52 | 28,55 |
|                                                                                              |   |       |       |       |
|                                                                                              | n | 52    | 8     | 22    |
| Preguntas con máximo % de acuerdo                                                            | n | 30    | 29    | 23    |
| Preguntas con % de acuerdo medio                                                             | n | 0     | 45    | 37    |
| Preguntas con mínimo % de acuerdo                                                            | n |       |       |       |

**Figura 1.** Importancia otorgada a cada una de las cuestiones por familiares (azul), enfermeras/os (rojo), médicos (gris) y global (amarillo). En el eje de abscisas figura el número de cada pregunta, y en el de ordenadas la puntuación otorgable a cada cuestión)

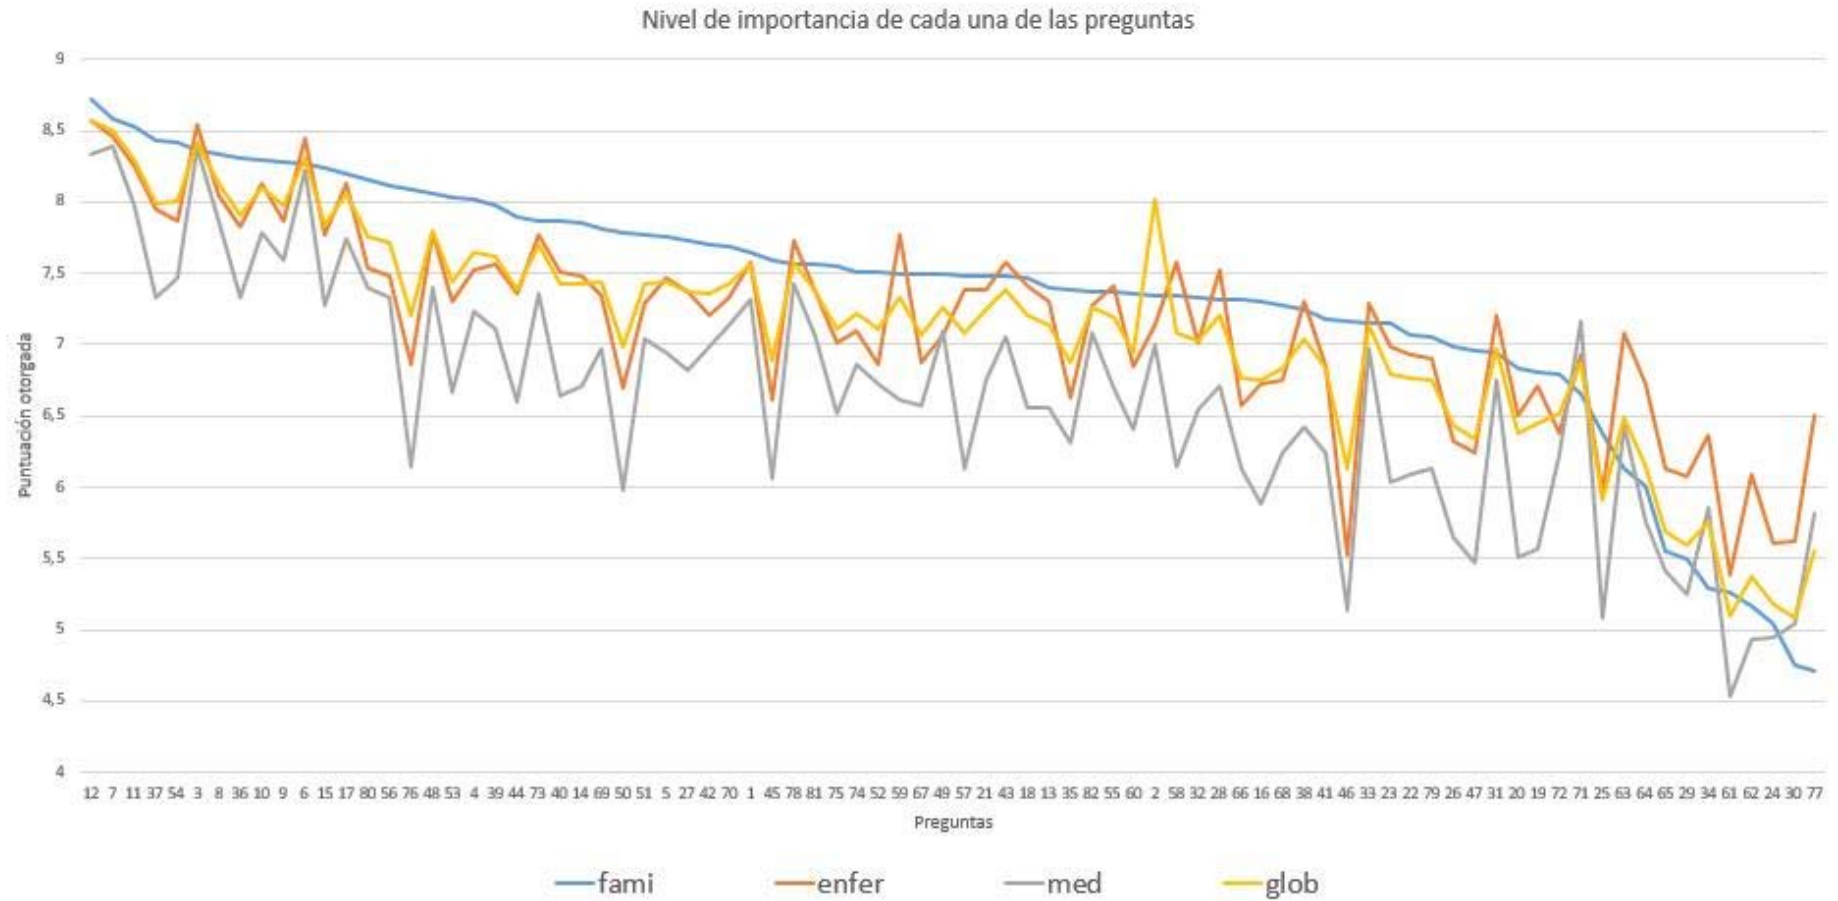



**Figura 2.** Orden de prioridad de cada una de las preguntas otorgado por cada grupo participante: familiares (azul), médicos (gris), enfermeras/os (rojo) y global (amarillo). En el eje de abscisas está el número de cada pregunta, ordenado según la importancia otorgada por los familiares. En el eje de ordenadas figura la prioridad otorgada a cada cuestión por cada grupo, siendo 1 la mayor importancia y 82 la menor.

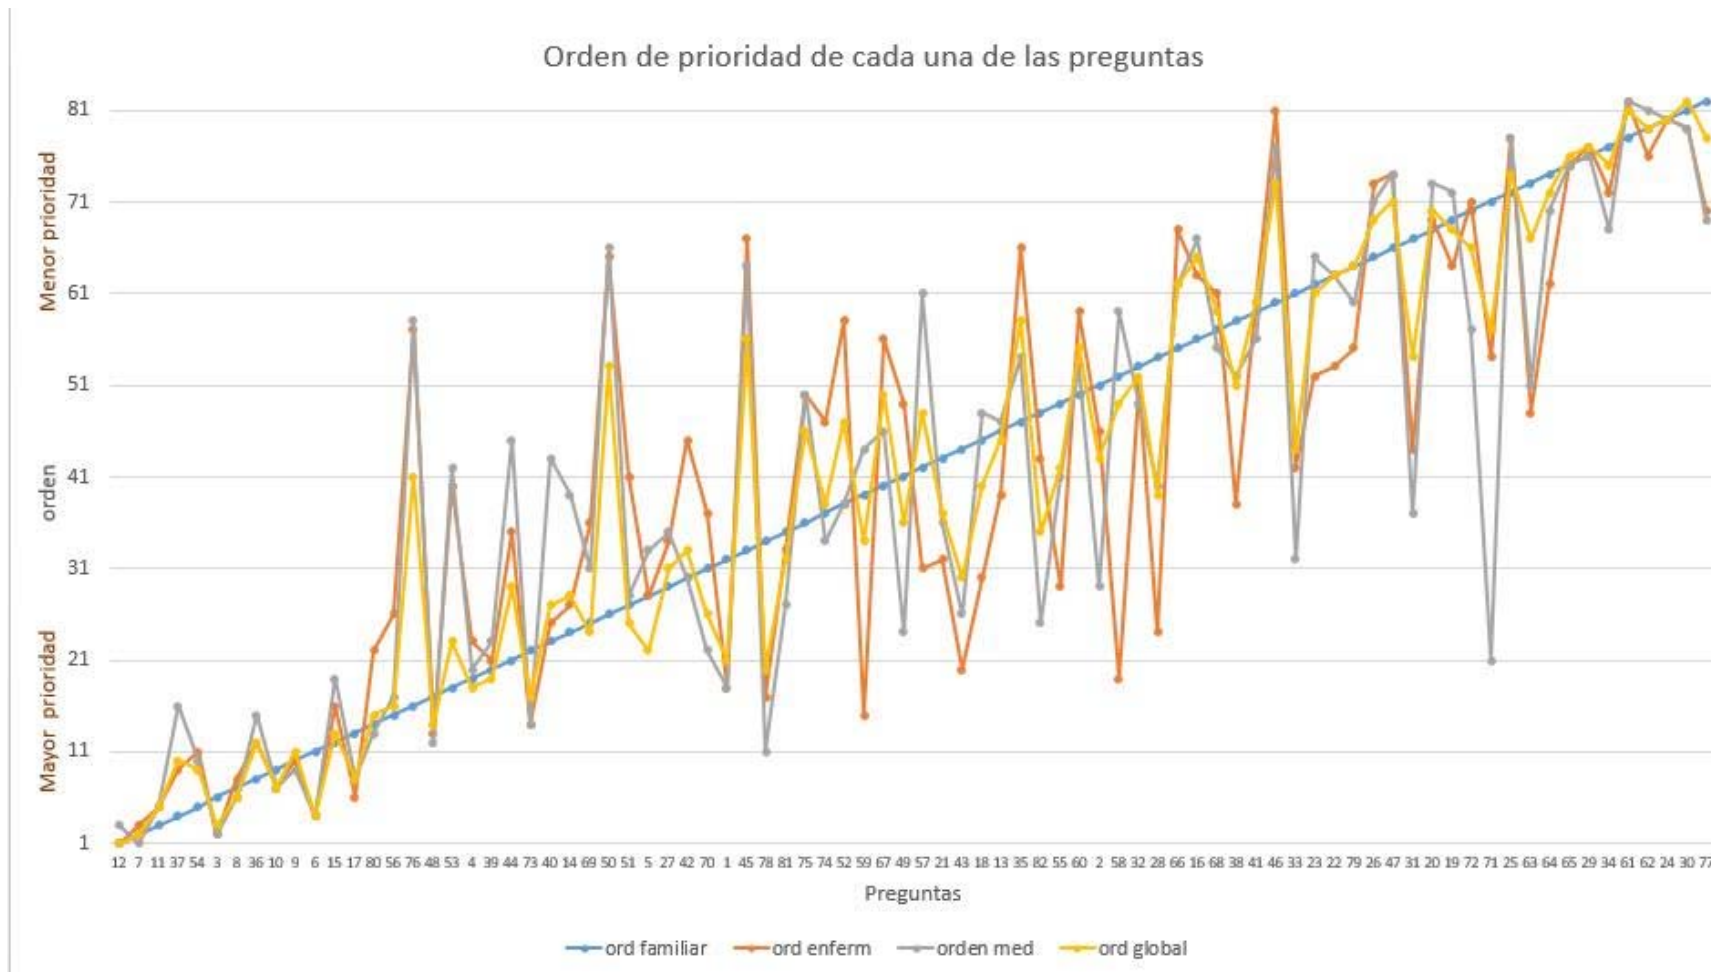

Supplement: mmc1 [file S2173572718300948:mmc1.pdf]
